# Supplementary material
Source: Springer Nature journal article supplement (https://www.springermedizin.de/resource/supplementary/12985_2009_798_MOESM2_ESM.pdf/9609220)

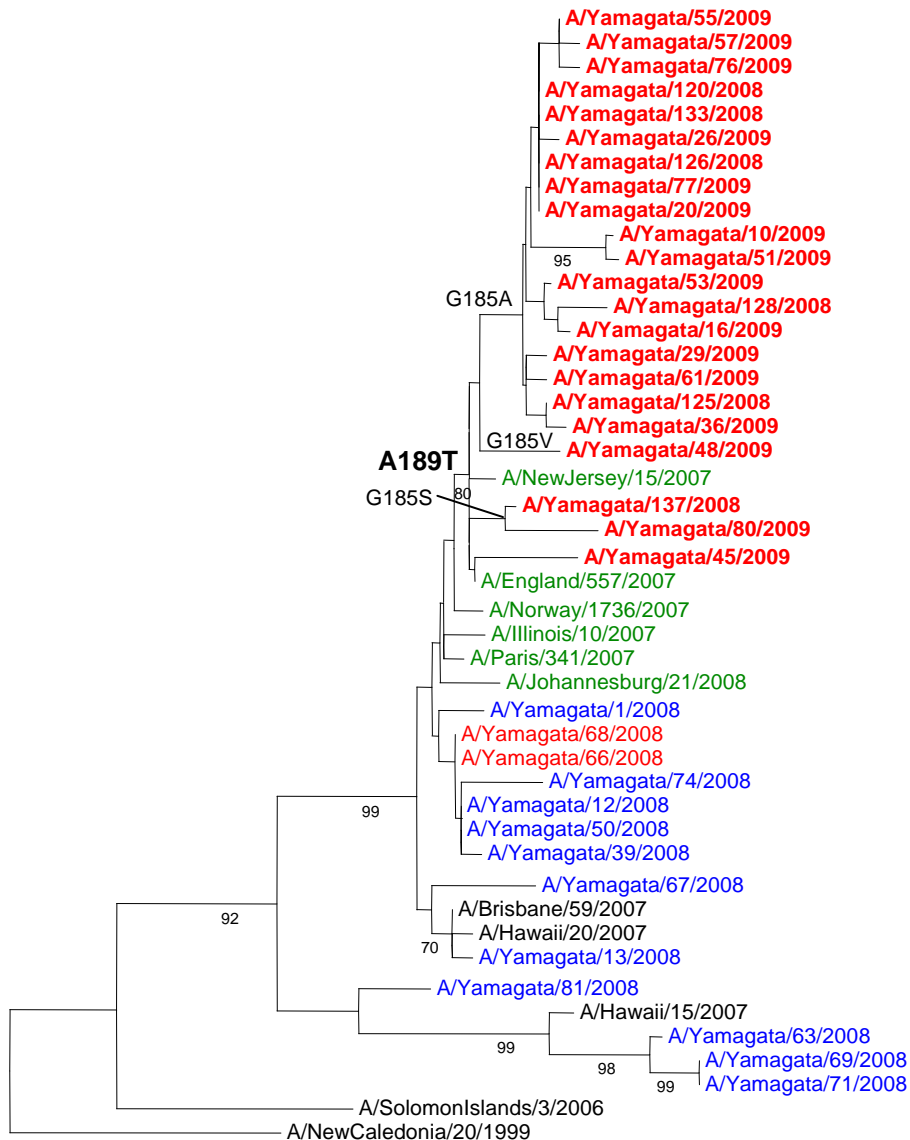

2B

2C

0.005

Supplement: MOESM2 [file 9609220]
